# Supplementary material for: Assessment of Psychological Distress and Peer Relations among Trans Adolescents—An Examination of the Use of Gender Norms and Parent–Child Congruence of the YSR-R/CBCL-R among a Treatment-Seeking Sample
Source: MDPI journal article supplement (doi:10.3390/children8100864), 2021-09-28
Supplement: s1 [file s1]

## Supplementary Materials

**Table S1.** Results of the one-way ANOVA for testing the effect of the at birth assigned sex on the main problem scale scores of the YSR-R.

| Scale            | Male norm         |                                | Female norm       |                    |
|------------------|-------------------|--------------------------------|-------------------|--------------------|
|                  | Statistics        | Sig., Effect size <sup>4</sup> | Statistics        | Sig., Effect size  |
| Int <sup>1</sup> | $F(1, 48) = 1.03$ | $p = .32, d = .36$             | $F(1, 48) = 1.51$ | $p = .23, d = .43$ |
| Ext <sup>2</sup> | $F(1, 48) = .37$  | $p = .54, d = .21$             | $F(1, 48) = .59$  | $p = .45, d = .27$ |
| Tot <sup>3</sup> | $F(1, 48) = .68$  | $p = .41, d = .29$             | $F(1, 48) = .143$ | $p = .24, d = .42$ |

<sup>1</sup>Internalizing Problems; <sup>2</sup>Externalizing Problems; <sup>3</sup>Total Problems; <sup>4</sup>Significance and effect size.

**Table S2.** Results of the t-test for dependent samples between means according to gender norms of the main and problem scales of the YSR-R for trans boys.

| trans boys ( $n = 38$ ) |                    |                     |                          |                            |                    |                    |
|-------------------------|--------------------|---------------------|--------------------------|----------------------------|--------------------|--------------------|
| Scale                   | Male norm          |                     | Female norm              |                            | BCa 95%            |                    |
|                         | $M\_GID (SD)^{12}$ | $M\_ABAS (SD)^{13}$ | Statistics <sup>14</sup> | Sig., Effect <sup>15</sup> | CI + <sup>16</sup> | CI - <sup>16</sup> |
| YSR_Int <sup>1</sup>    | 66.21 (12.31)      | 62.45 (11.30)       | $t(37) = -6.42$          | $p < .01, d = 1.04$        | 2.20               | 4.63               |
| YSR_Ext <sup>2</sup>    | 53.76 (8.14)       | 55.34 (9.23)        | $t(37) = -3.89$          | $p = .135, d = -.63$       | -2.57              | -.97               |
| YSR_Ges <sup>3</sup>    | 62.24 (10.62)      | 62.39 (10.36)       | $t(37) = -.18$           | $p = .818, d = -.03$       | -2.38              | 1.25               |
| YSR_AD <sup>4</sup>     | 66.39 (9.79)       | 64.18 (9.30)        | $t(37) = 2.82$           | $p = 1.83, d = -.46$       | .31                | 3.40               |
| YSR_WD <sup>5</sup>     | 63.63 (9.55)       | 62.42 (9.64)        | $t(37) = 3.68$           | $p = .057, d = -.60$       | .351               | 1.72               |
| YSR_SC <sup>6</sup>     | 61.58 (10.06)      | 58.45 (8.96)        | $t(37) = 10.45$          | $p < .01, d = 1.70$        | 2.59               | 3.59               |
| YSR_SP <sup>7</sup>     | 59.34 (8.35)       | 60.08 (8.77)        | $t(37) = -1.57$          | $p = .327, d = -.25$       | -2.04              | .00                |
| YSR_TP <sup>8</sup>     | 67.18 (11.45)      | 65.63 (10.51)       | $t(37) = 4.25$           | $p < .01, d = -.69$        | .71                | 2.17               |
| YSR_AP <sup>9</sup>     | 61.24 (11.72)      | 61.76 (11.53)       | $t(37) = -1.16$          | $p = .385, d = -.19$       | -1.64              | .166               |
| YSR_RB <sup>10</sup>    | 55.95 (5.97)       | 57.68 (7.14)        | $t(37) = -5.33$          | $p < .01, d = -.86$        | -2.57              | -1.15              |
| YSR_AB <sup>11</sup>    | 55.29 (5.75)       | 56.18 (6.38)        | $t(37) = -2.13$          | $p = .37, d = -.35$        | -1.97              | -.32               |

<sup>1</sup>Internalizing problems; <sup>2</sup>Externalizing Problems; <sup>3</sup>Total Problems; <sup>4</sup>Anxious/Depressed; <sup>5</sup>Withdrawn/Depressed; <sup>6</sup>Somatic Complaints; <sup>7</sup>Social Problems; <sup>8</sup>Thought Problems; <sup>9</sup>Attention Problems <sup>10</sup>Rule-Breaking Behavior; <sup>11</sup>Aggressive Behavior; <sup>12</sup>Mean according to gender identity norm; <sup>13</sup>Mean according to at birth assigned sex norm <sup>14</sup>Statistics of t-test for dependent samples; <sup>15</sup>Significance and effects; <sup>16</sup>95% bias-corrected and accelerated confidence interval.

**Table S3.** Results of the t-test for dependent samples between means according to gender norms of the main and problem scales of the CBCL-R for trans boys.

| trans boys ( <i>n</i> = 38) |                                           |                                            |                          |                                  |                    |                    |
|-----------------------------|-------------------------------------------|--------------------------------------------|--------------------------|----------------------------------|--------------------|--------------------|
|                             | Male norm                                 | Female norm                                | BCa 95%                  |                                  |                    |                    |
| Variable                    | <i>M</i> _GID ( <i>SD</i> ) <sup>12</sup> | <i>M</i> _ABAS ( <i>SD</i> ) <sup>13</sup> | Statistics <sup>14</sup> | Sig., Effect <sup>15</sup>       | CI + <sup>16</sup> | CI - <sup>16</sup> |
| CBCL_Int <sup>1</sup>       | 66.55 (11.81)                             | 64.08 (11.61)                              | <i>t</i> (37) = -5.54    | <i>p</i> < .01, <i>d</i> = 1.04  | -3.32              | -1.62              |
| CBCL_Ext <sup>2</sup>       | 54.40 (10.02)                             | 53.87 (11.39)                              | <i>t</i> (37) = -.49     | <i>p</i> = .627, <i>d</i> = -.63 | -2.76              | 1.31               |
| CBCL_Ges <sup>3</sup>       | 61.08 (10.43)                             | 61.79 (10.70)                              | <i>t</i> (37) = 1.27     | <i>p</i> = .250, <i>d</i> = -.03 | -.40               | 1.68               |
| CBCL_AD <sup>4</sup>        | 64.23 (10.65)                             | 64.12 (10.84)                              | <i>t</i> (37) = -.15     | <i>p</i> = .867, <i>d</i> = -.46 | -1.32              | 1.30               |
| CBCL_WD <sup>5</sup>        | 63.36 (8.60)                              | 64.35 (8.47)                               | <i>t</i> (37) = 1.95     | <i>p</i> = .146, <i>d</i> = -.60 | .27                | 1.82               |
| CBCL_SC <sup>6</sup>        | 62.52 (10.42)                             | 61.24 (10.26)                              | <i>t</i> (37) = -1.97    | <i>p</i> = .172, <i>d</i> = 1.70 | -2.27              | -.04               |
| CBCL_SP <sup>7</sup>        | 58.26 (6.91)                              | 59.24 (7.90)                               | <i>t</i> (37) = 2.28     | <i>p</i> < .05, <i>d</i> = -.25  | .113               | 1.82               |
| CBCL_TP <sup>8</sup>        | 62.14 (8.43)                              | 62.24 (8.48)                               | <i>t</i> (37) = .25      | <i>p</i> = .830, <i>d</i> = -.69 | -.82               | .81                |
| CBCL_AP <sup>9</sup>        | 58.28 (8.37)                              | 59.86 (8.65)                               | <i>t</i> (37) = 3.29     | <i>p</i> < .01, <i>d</i> = -.19  | .64                | 2.35               |
| CBCL_RB <sup>10</sup>       | 56.20 (6.42)                              | 58.12 (7.60)                               | <i>t</i> (37) = 5.45     | <i>p</i> < .01, <i>d</i> = -.86  | 1.25               | 2.56               |
| CBCL_AB <sup>11</sup>       | 55.15 (6.85)                              | 56.26 (8.72)                               | <i>t</i> (37) = 1.74     | <i>p</i> = .084, <i>d</i> = -.35 | -.15               | 2.19               |

<sup>1</sup>Internalizing Problems; <sup>2</sup>Externalizing Problems; <sup>3</sup>Total Problems; <sup>4</sup>Anxious/Depressed; <sup>5</sup>Withdrawn/Depressed; <sup>6</sup>Somatic Complaints; <sup>7</sup>Social Problems; <sup>8</sup>Thought Problems; <sup>9</sup>Attention Problems <sup>10</sup>Rule-Breaking Behavior; <sup>11</sup>Aggressive Behavior; <sup>12</sup>Mean according to gender identity norm; <sup>13</sup>Mean according to at birth assigned sex norm <sup>14</sup>Statistics of t-test for dependent samples; <sup>15</sup>Significance and effects; <sup>16</sup>95% bias-corrected and accelerated confidence interval.

**Table S4.** Results of the t-test for dependent samples between means according to gender norms of the main and problem scales of the YSR-R for trans girls.

| trans girls ( <i>n</i> = 11) |                                           |                                            |                          |                                 |                    |                    |
|------------------------------|-------------------------------------------|--------------------------------------------|--------------------------|---------------------------------|--------------------|--------------------|
|                              | Female norm                               | Male norm                                  | BCa 95%                  |                                 |                    |                    |
| Scale                        | <i>M</i> _GID ( <i>SD</i> ) <sup>12</sup> | <i>M</i> _ABAS ( <i>SD</i> ) <sup>13</sup> | Statistics <sup>14</sup> | Sig., Effect <sup>15</sup>      | CI + <sup>16</sup> | CI - <sup>16</sup> |
| YSR_Int <sup>1</sup>         | 58.27 (9.78)                              | 62.55 (10.85)                              | <i>t</i> (10) = 12.84    | <i>p</i> < .01, <i>d</i> = 1.04 | 3.60               | 4.90               |
| YSR_Ext <sup>2</sup>         | 52.91 (5.77)                              | 52.00 (5.39)                               | <i>t</i> (10) = -4.30    | <i>p</i> < .01, <i>d</i> = -.63 | -1.30              | -.42               |
| YSR_Ges <sup>3</sup>         | 58.55 (8.29)                              | 59.64 (8.08)                               | <i>t</i> (10) = 4.35     | <i>p</i> < .01, <i>d</i> = 1.31 | .57                | 1.56               |
| YSR_AD <sup>4</sup>          | 58.91 (9.24)                              | 60.91 (10.62)                              | <i>t</i> (10) = 3.96     | <i>p</i> < .05, <i>d</i> = -.46 | 1.11               | 2.83               |

|                      |               |               |                 |                      |       |      |
|----------------------|---------------|---------------|-----------------|----------------------|-------|------|
| YSR_WD <sup>5</sup>  | 62.73 (10.45) | 64.18 (10.04) | $t(10) = 5.16$  | $p < .01, d = -.60$  | .88   | 2.00 |
| YSR_SC <sup>6</sup>  | 56.09 (4.91)  | 59.55 (6.65)  | $t(10) = 5.98$  | $p < .05, d = 1.70$  | 2.31  | 4.50 |
| YSR_SP <sup>7</sup>  | 60.82 (8.40)  | 60.82 (7.56)  | $t(10) = .00$   | $p = 1.00, d = -.25$ | -1.23 | 1.59 |
| YSR_TP <sup>8</sup>  | 60.64 (8.57)  | 62.55 (9.22)  | $t(10) = 4.87$  | $p < .01, d = -.69$  | 1.14  | 2.75 |
| YSR_AP <sup>9</sup>  | 60.18 (6.79)  | 59.36 (6.90)  | $t(10) = -1.94$ | $p = .084, d = -.19$ | -1.58 | .00  |
| YSR_RB <sup>10</sup> | 55.27 (6.60)  | 54.27 (5.67)  | $t(10) = -3.71$ | $p < .01, d = -.86$  | -1.60 | -.50 |
| YSR_AB <sup>11</sup> | 52.82 (2.72)  | 52.36 (2.34)  | $t(10) = -2.89$ | $p < .05, d = -.35$  | -.78  | -.17 |

<sup>1</sup>Internalizing problems; <sup>2</sup>Externalizing problems; <sup>3</sup>Total problems; <sup>4</sup>Anxious/depressed; <sup>5</sup>Withdrawn/Depressed; <sup>6</sup>Somatic Complaints; <sup>7</sup>Social Problems; <sup>8</sup>Thought Problems; <sup>9</sup>Attention Problems <sup>10</sup>Rule-Breaking Behavior; <sup>11</sup>Aggressive Behavior; <sup>12</sup>Mean according to gender identity norm; <sup>13</sup>Mean according to at birth assigned sex norm <sup>14</sup>Statistics of t-test for dependent samples; <sup>15</sup>Significance and effects; <sup>16</sup>95% bias-corrected and accelerated confidence interval.

**Table S5.** Results of the t-test for dependent samples between means according to gender norms of the main and problem scales of the CBCL-R for trans girls.

| trans girls ( $n = 11$ ) |                    |                     |                          |                            |                    |                    |
|--------------------------|--------------------|---------------------|--------------------------|----------------------------|--------------------|--------------------|
|                          | Female norm        | Male Norm           | BCa 95%                  |                            |                    |                    |
| Scale                    | $M\_GID (SD)^{12}$ | $M\_ABAS (SD)^{13}$ | Statistics <sup>14</sup> | Sig., Effect <sup>15</sup> | CI + <sup>16</sup> | CI - <sup>16</sup> |
| CBCL_Int <sup>1</sup>    | 64.36 (12.04)      | 66.91 (13.10)       | $t(10) = 12.84$          | $p < .01, d = -1.99$       | -3.37              | -1.76              |
| CBCL_Ext <sup>2</sup>    | 56.45 (6.92)       | 56.82 (5.81)        | $t(10) = -4.30$          | $p = .852, d = -.05$       | -6.11              | 2.8                |
| CBCL_Ges <sup>3</sup>    | 64.09 (8.89)       | 63.09 (8.14)        | $t(10) = 4.35$           | $p = .080, d = -.03$       | .22                | 1.75               |
| CBCL_AD <sup>4</sup>     | 61.82 (10.73)      | 63.00 (10.75)       | $t(10) = 3.96$           | $p < .01, d = .67$         | -1.56              | -.80               |
| CBCL_WD <sup>5</sup>     | 70.91 (15.17)      | 69.64 (14.92)       | $t(10) = 5.16$           | $p < .01, d = 1.15$        | .53                | 1.91               |
| CBCL_SC <sup>6</sup>     | 58.91 (9.64)       | 60.55 (10.12)       | $t(10) = 5.98$           | $p < .05, d = -1.00$       | -2.83              | -.55               |
| CBCL_SP <sup>7</sup>     | 60.18 (10.45)      | 59.27 (8.91)        | $t(10) = .00$            | $p = .114, d = .54$        | -.10               | 1.91               |
| CBCL_TP <sup>8</sup>     | 61.00 (8.96)       | 60.45 (8.60)        | $t(10) = 4.87$           | $p = .237, d = .45$        | .09                | 1.40               |
| CBCL_AP <sup>9</sup>     | 67.82 (11.14)      | 65.55 (11.30)       | $t(10) = -1.94$          | $p < .01, d = 1.91$        | 1.56               | 2.93               |
| CBCL_RB <sup>10</sup>    | 57.18 (6.42)       | 55.45 (5.22)        | $t(10) = -3.71$          | $p < .05, d = .91$         | .58                | 2.67               |
| CBCL_AB <sup>11</sup>    | 57.00 (6.29)       | 55.73 (5.10)        | $t(10) = -2.89$          | $p < .05, d = .86$         | .46                | 2.14               |

<sup>1</sup>Internalizing Problems; <sup>2</sup>Externalizing Problems; <sup>3</sup>Total Problems; <sup>4</sup>Anxious/Depressed; <sup>5</sup>Withdrawn/Depressed; <sup>6</sup>Somatic Complaints; <sup>7</sup>Social Problems; <sup>8</sup>Thought Problems; <sup>9</sup>Attention Problems <sup>10</sup>Rule-Breaking Behavior; <sup>11</sup>Aggressive Behavior; <sup>12</sup>Mean according to gender identity norm; <sup>13</sup>Mean according to at birth assigned

sex norm;<sup>14</sup>Statistics of t-test for dependent samples; <sup>15</sup>Significance and effects; <sup>16</sup>95% bias-corrected and accelerated confidence interval of mean differences.

**Table S6.** Results of the McNemar-Test indicating the change between the clinical significance of the evaluation norms from GID to ABAS from the YSR-R for trans boys.

| trans boys ( <i>n</i> = 38) |                               |                               |                            |                  |                   |                   |
|-----------------------------|-------------------------------|-------------------------------|----------------------------|------------------|-------------------|-------------------|
|                             | Male norm                     | Female norm                   | BCa 95%                    |                  |                   |                   |
| Scale                       | N_cl. sign. (%) <sup>12</sup> | N_cl. sign. (%) <sup>13</sup> | Sig. McNemar <sup>14</sup> | OR <sup>15</sup> | CI+ <sup>16</sup> | CI- <sup>16</sup> |
| YSR_Int <sup>1</sup>        | 23 (60.5)                     | 18 (47.4)                     | <i>p</i> = .125            | 1.7              | 0.69              | 4.23              |
| YSR_Ext <sup>2</sup>        | 5 (13.2)                      | 10 (26.3)                     | <i>p</i> = .063            | 0.42             | 0.13              | 1.39              |
| YSR_Ges <sup>3</sup>        | 18 (47.4)                     | 19 (50.0)                     | <i>p</i> = 1.000           | 0.9              | 0.37              | 2.21              |
| YSR_AD <sup>4</sup>         | 16 (42.1)                     | 11 (28.9)                     | <i>p</i> = .125            | 1.79             | 0.69              | 4.62              |
| YSR_WD <sup>5</sup>         | 10 (26.3)                     | 6 (15.8)                      | <i>p</i> = .125            | 1.9              | 0.61              | 5.91              |
| YSR_SC <sup>6</sup>         | 10 (26.3)                     | 4 (10.5)                      | <i>p</i> < .05             | 3.04             | 0.86              | 10.73             |
| YSR_SP <sup>7</sup>         | 3 (7.9)                       | 4 (10.5)                      | <i>p</i> = 1.000           | 0.73             | 0.15              | 3.5               |
| YSR_TP <sup>8</sup>         | 18 (47.4)                     | 15 (39.5)                     | <i>p</i> = .250            | 1.38             | 0.56              | 3.43              |
| YSR_AP <sup>9</sup>         | 6 (15.8)                      | 6 (15.8)                      | <i>p</i> = 1.000           | 1                | 0.29              | 3.43              |
| YSR_RB <sup>10</sup>        | 1 (2.6)                       | 2 (5.3)                       | <i>p</i> = 1.000           | 0.49             | 0.04              | 5.6               |
| YSR_AB <sup>11</sup>        | —                             | —                             | —                          | —                | —                 | —                 |

<sup>1</sup>Internalizing Problems; <sup>2</sup>Externalizing Problems; <sup>3</sup>Total Problems; <sup>4</sup>Anxious/Depressed; <sup>5</sup>Withdrawn/Depressed; <sup>6</sup>Somatic Complaints; <sup>7</sup>Social Problems; <sup>8</sup>Thought Problems; <sup>9</sup>Attention Problems <sup>10</sup>Rule-Breaking Behavior; <sup>11</sup>Aggressive Behavior; <sup>12</sup>Number/percentage of clinical significant cases (*T* > 63/69) according gender identity norm; <sup>13</sup>Number/percentage of clinical significant cases according at birth assigned sex norm; <sup>14</sup>Significance of McNemar-Test; <sup>15</sup>Odds ratio; <sup>16</sup>95% bias-corrected and accelerated confidence interval.

**Table S7.** Results of the McNemar-Test indicating the change between the clinical significance of the evaluation norms from GID to ABAS from the CBCL-R for trans girls.

| trans boys ( <i>n</i> = 38) |                              |                              |                            |                  |                   |                   |
|-----------------------------|------------------------------|------------------------------|----------------------------|------------------|-------------------|-------------------|
|                             | Male norm                    | Female norm                  | BCa 95%                    |                  |                   |                   |
| Scale                       | N_cl.sign. (%) <sup>12</sup> | N_cl.sign. (%) <sup>13</sup> | Sig. McNemar <sup>14</sup> | OR <sup>15</sup> | CI+ <sup>16</sup> | CI- <sup>16</sup> |
| CBCL_Int <sup>1</sup>       | 20 (52.6)                    | 21 (55.3)                    | <i>p</i> = 1.000           | 0.9              | 0.36              | 2.22              |
| CBCL_Ext <sup>2</sup>       | 11 (29.0)                    | 10 (26.3)                    | <i>p</i> = 1.000           | 1.14             | 0.42              | 3.12              |

|                       |           |           |             |      |      |      |
|-----------------------|-----------|-----------|-------------|------|------|------|
| CBCL_Ges <sup>3</sup> | 20 (52.6) | 21 (55.3) | $p = 1.000$ | 0.9  | 0.36 | 2.22 |
| CBCL_AD <sup>4</sup>  | 14 (36.8) | 11 (28.9) | $p = .375$  | 1.43 | 0.55 | 3.75 |
| CBCL_WD <sup>5</sup>  | 5 (13.2)  | 5 (13.2)  | $p = 1.000$ | 1    | 0.26 | 3.78 |
| CBCL_SC <sup>6</sup>  | 11 (29.0) | 7 (18.4)  | $p = .219$  | 1.8  | 0.61 | 5.31 |
| CBCL_SP <sup>7</sup>  | 2 (5.3)   | 4 (10.5)  | $p = 6.25$  | 0.47 | 0.08 | 2.75 |
| CBCL_TP <sup>8</sup>  | 7 (18.4)  | 10 (26.3) | $p = .375$  | 0.63 | 0.21 | 1.89 |
| CBCL_AP <sup>9</sup>  | 4 (10.5)  | 4 (10.5)  | $p = 1.000$ | 1    | 0.23 | 4.33 |
| CBCL_RB <sup>10</sup> | 1 (2.6)   | 4 (10.5)  | $p = .250$  | 0.23 | 0.02 | 2.16 |
| CBCL_AB <sup>11</sup> | 2 (5.3)   | 5 (13.2)  | $p = .375$  | 0.37 | 0.37 | 2.02 |

<sup>1</sup>Internalizing Problems; <sup>2</sup>Externalizing Problems; <sup>3</sup>Total Problems; <sup>4</sup>Anxious/Depressed; <sup>5</sup>Withdrawn/Depressed; <sup>6</sup>Somatic Complaints; <sup>7</sup>Social Problems; <sup>8</sup>Thought Problems; <sup>9</sup>Attention Problems <sup>10</sup>Rule-Breaking Behavior; <sup>11</sup>Aggressive Behavior; <sup>12</sup>Number/percentage of clinical significant cases ( $T > 63/69$ ) according gender identity norm; <sup>13</sup>Number/percentage of clinical significant cases according at birth assigned sex norm; <sup>14</sup>Significance of McNemar-Test; <sup>15</sup>Odds ratio; <sup>16</sup>95% bias-corrected and accelerated confidence interval.

**Table S8.** Results of the McNemar-Test indicating the change between the clinical significance of the evaluation norms from GID to ABAS from the YSR-R for trans girls.

| trans girls ( $n = 11$ ) |                               |                               |                            |                  |                  |                  |
|--------------------------|-------------------------------|-------------------------------|----------------------------|------------------|------------------|------------------|
| Scale                    | Female norm                   | Male norm                     | BCa 95%                    |                  |                  |                  |
|                          | N_cl. sign. (%) <sup>12</sup> | N_cl. sign. (%) <sup>13</sup> | Sig. McNemar <sup>14</sup> | OR <sup>15</sup> | CI <sup>16</sup> | CI <sup>16</sup> |
| YSR_Int <sup>1</sup>     | 6 (54.5)                      | 6 (54.5)                      | $p = 1.000$                | 1                | 0.19             | 5.36             |
| YSR_Ext <sup>2</sup>     | —                             | —                             | —                          | —                | —                | —                |
| YSR_Ges <sup>3</sup>     | 5 (45.5)                      | 5 (45.5)                      | $p = 1.000$                | 1                | 0.19             | 5.36             |
| YSR_AD <sup>4</sup>      | 1 (9.1)                       | 2 (18.2)                      | $p = 1.000$                | 0.45             | 0.03             | 5.84             |
| YSR_WD <sup>5</sup>      | 1 (9.1)                       | 2 (18.2)                      | $p = 1.000$                | 0.45             | 0.03             | 5.84             |
| YSR_SC <sup>6</sup>      | —                             | —                             | —                          | —                | —                | —                |
| YSR_SP <sup>7</sup>      | 1 (9.1)                       | 1 (9.1)                       | $p = 1.000$                | 1                | 0.05             | 18.3             |
| YSR_TP <sup>8</sup>      | 2 (18.2)                      | 3 (27.3)                      | $p = 1.000$                | 0.59             | 0.08             | 4.5              |
| YSR_AP <sup>9</sup>      | 1 (9.1)                       | 1 (9.1)                       | $p = 1.000$                | 1                | 0.05             | 18.3             |
| YSR_RB <sup>10</sup>     | 1 (8.1)                       | —                             | —                          | —                | —                | —                |

YSR\_AB<sup>11</sup>

—

—

—

—

<sup>1</sup>Internalizing Problems; <sup>2</sup>Externalizing Problems; <sup>3</sup>Total Problems; <sup>4</sup>Anxious/Depressed; <sup>5</sup>Withdrawn/Depressed; <sup>6</sup>Somatic Complaints; <sup>7</sup>Social Problems; <sup>8</sup>Thought Problems; <sup>9</sup>Attention Problems <sup>10</sup>Rule-Breaking Behavior; <sup>11</sup>Aggressive Behavior; <sup>12</sup>Number/percentage of clinical significant cases ( $T > 63/69$ ) according gender identity norm; <sup>13</sup>Number/percentage of clinical significant cases according at birth assigned sex norm; <sup>14</sup>Significance of McNemar-Test; <sup>15</sup>Odds ratio; <sup>16</sup>95% bias-corrected and accelerated confidence interval.

**Table S9.** Results of the McNemar-Test indicating the change between the clinical significance of the evaluation norms from GID to ABAS from the CBCL-R for trans girls.

| trans* Mädchen ( $n = 11$ ) |                          |                          |                            |                  |                  |                  |
|-----------------------------|--------------------------|--------------------------|----------------------------|------------------|------------------|------------------|
|                             | Female norm              | Male norm                | BCa 95%                    |                  |                  |                  |
| Scale                       | $N_{cl.auff.} (\%)^{12}$ | $N_{cl.sign.} (\%)^{13}$ | Sig. McNemar <sup>14</sup> | OR <sup>15</sup> | CI <sup>16</sup> | CI <sup>16</sup> |
| CBCL_Int <sup>1</sup>       | 5 (45.5)                 | 6 (54.5)                 | $p = 1.000$                | 0.69             | 0.13             | 3.72             |
| CBCL_Ext <sup>2</sup>       | 1 (9.1)                  | 2 (18.2)                 | $p = 1.000$                | 0.45             | 0.03             | 5.84             |
| CBCL_Ges <sup>3</sup>       | 6 (54.5)                 | 6 (54.5)                 | $p = 1.000$                | 1                | 0.19             | 5.36             |
| CBCL_AD <sup>4</sup>        | 3 (27.3)                 | 3 (27.3)                 | $p = 1.000$                | 1                | 0.15             | 6.53             |
| CBCL_WD <sup>5</sup>        | 5 (45.5)                 | 5 (45.5)                 | $p = 1.000$                | 0.45             | 0.08             | 2.67             |
| CBCL_SC <sup>6</sup>        | 3 (27.3)                 | 3 (27.3)                 | $p = 1.000$                | 1                | 0.15             | 6.53             |
| CBCL_SP <sup>7</sup>        | 2 (18.2)                 | 2 (18.2)                 | $p = 1.000$                | 1                | 0.11             | 8.73             |
| CBCL_TP <sup>8</sup>        | 3 (27.3)                 | 2 (18.2)                 | $p = 1.000$                | 1.69             | 0.22             | 12.81            |
| CBCL_AP <sup>9</sup>        | 4 (36.4)                 | 4 (36.4)                 | $p = 1.000$                | 1                | 0.18             | 5.68             |
| CBCL_RB <sup>10</sup>       | —                        | —                        | —                          | —                |                  |                  |
| CBCL_AB <sup>11</sup>       | 1 (9.1)                  | —                        | —                          | —                |                  |                  |

<sup>1</sup>Internalizing Problems; <sup>2</sup>Externalizing Problems; <sup>3</sup>Total problems; <sup>4</sup>Anxious/Depressed; <sup>5</sup>Withdrawn/Depressed; <sup>6</sup>Somatic Complaints; <sup>7</sup>Social Problems; <sup>8</sup>Thought Problems; <sup>9</sup>Attention Problems <sup>10</sup>Rule-Breaking Behavior; <sup>11</sup>Aggressive Behavior; <sup>12</sup>Number/percentage of clinical significant cases ( $T > 63/69$ ) according gender identity norm; <sup>13</sup>Number/percentage of clinical significant cases according at birth assigned sex norm; <sup>14</sup>Significance of McNemar-Test; <sup>15</sup>Odds ratio; <sup>16</sup>95% bias-corrected and accelerated confidence interval.
